# Supplementary material for: Qualitative soil moisture assessment in semi-arid Africa – the role of experience and training on inter-rater reliability
Source: Copernicus journal article supplement (doi:10.5194/hess-19-3505-2015), 2015-08-10
Supplement: Supplementary file 3 [file supplement_03_soil-moisture-assessment-form_june_v10_english.pdf › supplement_03_soil-moisture-assessment-form_june_v10_english.pdf]

|                    | Icon                                                                              | Class | Classname     | Description                                      |
|--------------------|-----------------------------------------------------------------------------------|-------|---------------|--------------------------------------------------|
| Wetness Indicators |  | 1     | very dry      | "dust dry"                                       |
|                    |  | 2     | dry           | dry, but with some moist look                    |
|                    |  | 3     | below optimal | drier than optimal for seeding                   |
|                    |  | 4     | optimal       | optimal for seeding crops                        |
|                    |  | 5     | above optimal | wetter than optimal - one can form a solid brick |
|                    |  | 6     | wet           | when you step on the soil, water liquifies       |
|                    |  | 7     | very wet      | water ponding on the soil surface                |

**Name**

**Date**

**Time**

© Rinderer et al. (2015): Qualitative soil moisture assessment in semi-arid Africa - The role of experience and training on interrater reliability - In: HESSD

| Site    | Wetnessclass | Note |
|---------|--------------|------|
| Site 1  |              |      |
| Site 2  |              |      |
| Site 3  |              |      |
| Site 4  |              |      |
| Site 5  |              |      |
| Site 6  |              |      |
| Site 7  |              |      |
| Site 8  |              |      |
| Site 9  |              |      |
| Site 10 |              |      |
| Site 11 |              |      |
| Site 12 |              |      |
| Site 13 |              |      |
| Site 14 |              |      |
