# Supplementary material for: Qualitative soil moisture assessment in semi-arid Africa – the role of experience and training on inter-rater reliability
Source: Copernicus journal article supplement (doi:10.5194/hess-19-3505-2015), 2015-08-10
Supplement: Supplementary file 4 [file supplement_04_soil-moisture-assessment-form_april_v10_swahili.pdf › supplement_04_soil-moisture-assessment-form_april_v10_swahili.pdf]

|                          | Picha                                                                             | Daraja | Vigezo           | Maelezo                                                       |
|--------------------------|-----------------------------------------------------------------------------------|--------|------------------|---------------------------------------------------------------|
| Viashiria ya unyevunyevu |  | 1      | Kavu sana        | Kavu Kabisa, udongo unatoa vumbi                              |
|                          |  | 2      | Kavu-kavu        | Kavu, uwezi kupanda mimea.                                    |
|                          |  | 3      | Chini ya kawaida | Udongo una unyevu kwa mbali. Udongo hauwezi kuufinyanga       |
|                          |  | 4      | Kwaida           | nzuri kupanda mimea. Udongo unaachia                          |
|                          |  | 5      | Zaidi ya kwaida  | unanata, unaweza kuufinyanga                                  |
|                          |  | 6      | Chepe-chepe      | Tope- ukiukanyaga unatoa maji. Huwezi kuufinyanga, tope laini |
|                          |  | 7      | Mafuriko         | Tope laini kupitiliza - unaona maji yanelea juu ya udongo     |

**Jina**

**Tarehe**

**Muda**

© Rinderer et al. (2015): Qualitative soil moisture assessment in semi-arid Africa - The role of experience and training on interrater reliability - In: HESSD

| Kituo    | Daraja ulilo ona | Maelezo |
|----------|------------------|---------|
| Kituo 1  |                  |         |
| Kituo 2  |                  |         |
| Kituo 3  |                  |         |
| Kituo 4  |                  |         |
| Kituo 5  |                  |         |
| Kituo 6  |                  |         |
| Kituo 7  |                  |         |
| Kituo 8  |                  |         |
| Kituo 9  |                  |         |
| Kituo 10 |                  |         |
| Kituo 11 |                  |         |
| Kituo 12 |                  |         |
| Kituo 13 |                  |         |
| Kituo 14 |                  |         |
