# Supplementary material for: Qualitative soil moisture assessment in semi-arid Africa – the role of experience and training on inter-rater reliability
Source: Copernicus journal article supplement (doi:10.5194/hess-19-3505-2015), 2015-08-10
Supplement: Supplementary file [file hess-19-3505-2015-supplement-title-page.pdf › hess-19-3505-2015-supplement-title-page.pdf]

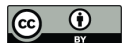

## *Supplement of*

# **Qualitative soil moisture assessment in semi-arid Africa – the role of experience and training on inter-rater reliability**

**M. Rinderer et al.**

*Correspondence to:* M. Rinderer ([michael.rinderer@duke.edu](mailto:michael.rinderer@duke.edu))

- [hess-19-3505-2015-supplement-title-page.pdf](#)
- [supplement\\_01\\_soil-moisture-assessment-form\\_april\\_v08\\_english.pdf](#)
- [supplement\\_02\\_soil-moisture-assessment-form\\_april\\_v08\\_swahili.pdf](#)
- [supplement\\_03\\_soil-moisture-assessment-form\\_june\\_v10\\_english.pdf](#)
- [supplement\\_04\\_soil-moisture-assessment-form\\_april\\_v10\\_swahili.pdf](#)

The copyright of individual parts of the supplement might differ from the CC-BY 3.0 licence.
